# Supplementary material
Source: publisher figshare collection journal article supplement (https://acs.figshare.com/ndownloader/files/7422451)
Supplement: Supplementary file 1 [file 7422451]

## *Supporting Information*

# Excitonic and Polaronic Properties of 2D Hybrid Organic-Inorganic Perovskites

*Jun Yin,<sup>1,2</sup> Hong Li,<sup>1</sup> Daniele Cortecchia,<sup>3</sup> Cesare Soci,<sup>2</sup> and Jean-Luc Brédas<sup>1,\*</sup>*

<sup>1</sup> Laboratory for Computational and Theoretical Chemistry of Advanced Materials, Division of Physical Science and Engineering, King Abdullah University of Science and Technology, Thuwal 23955-6900, Kingdom of Saudi Arabia

<sup>2</sup> Division of Physics and Applied Physics, School of Physical and Mathematical Sciences, Nanyang Technological University, 21 Nanyang Link, Singapore 637371

<sup>3</sup> Energy Research Institute@NTU (ERI@N), Research Techno Plaza, Nanyang Technological University, 50 Nanyang Drive, Singapore 637553

### **Corresponding Author**

[jean-luc.bredas@kaust.edu.sa](mailto:jean-luc.bredas@kaust.edu.sa); [jean-luc.bredas@chemistry.gatech.edu](mailto:jean-luc.bredas@chemistry.gatech.edu)

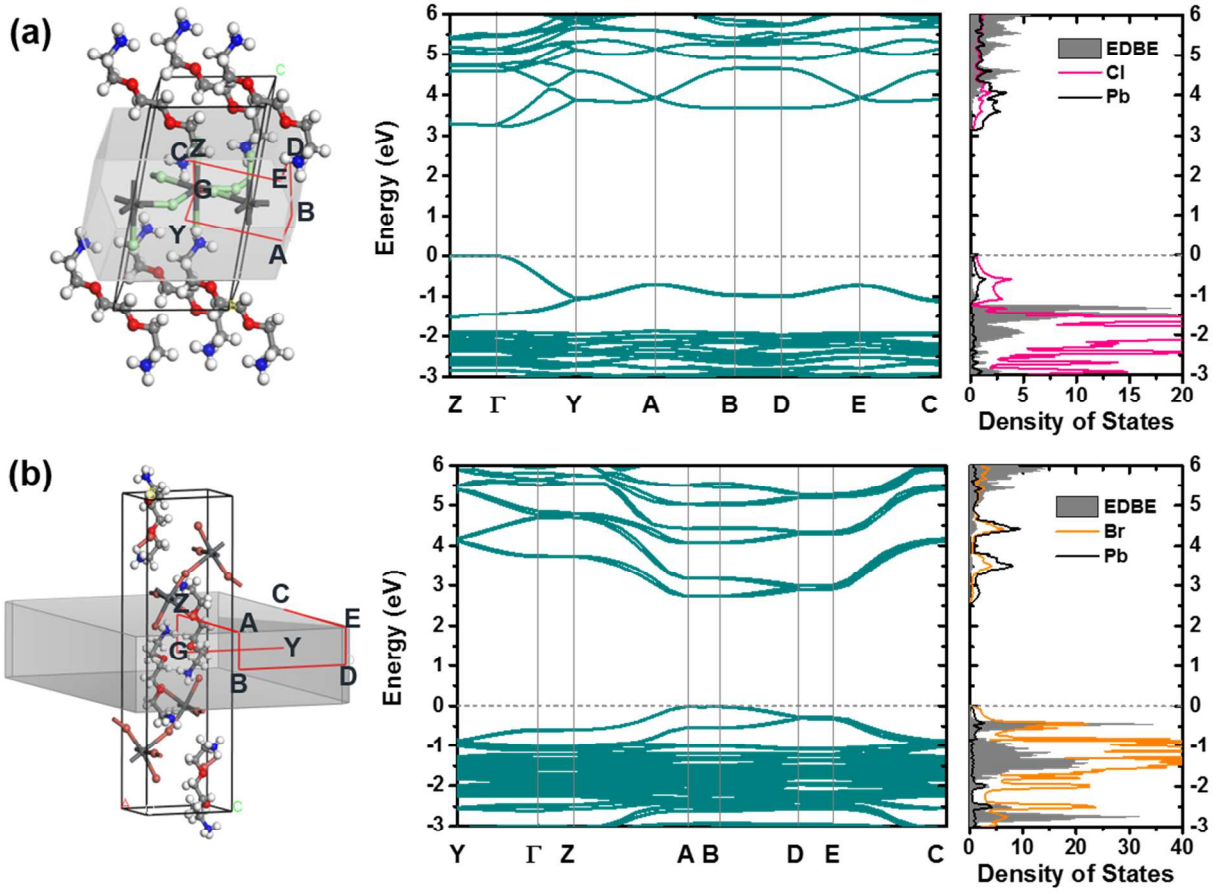

**Figure S1.** Band structures and densities of states of the two-dimensional perovskites: (a) (EDBE)PbCl<sub>4</sub> and (b) (EDBE)PbBr<sub>4</sub>, calculated at the HSE+SOC level (VASP code).

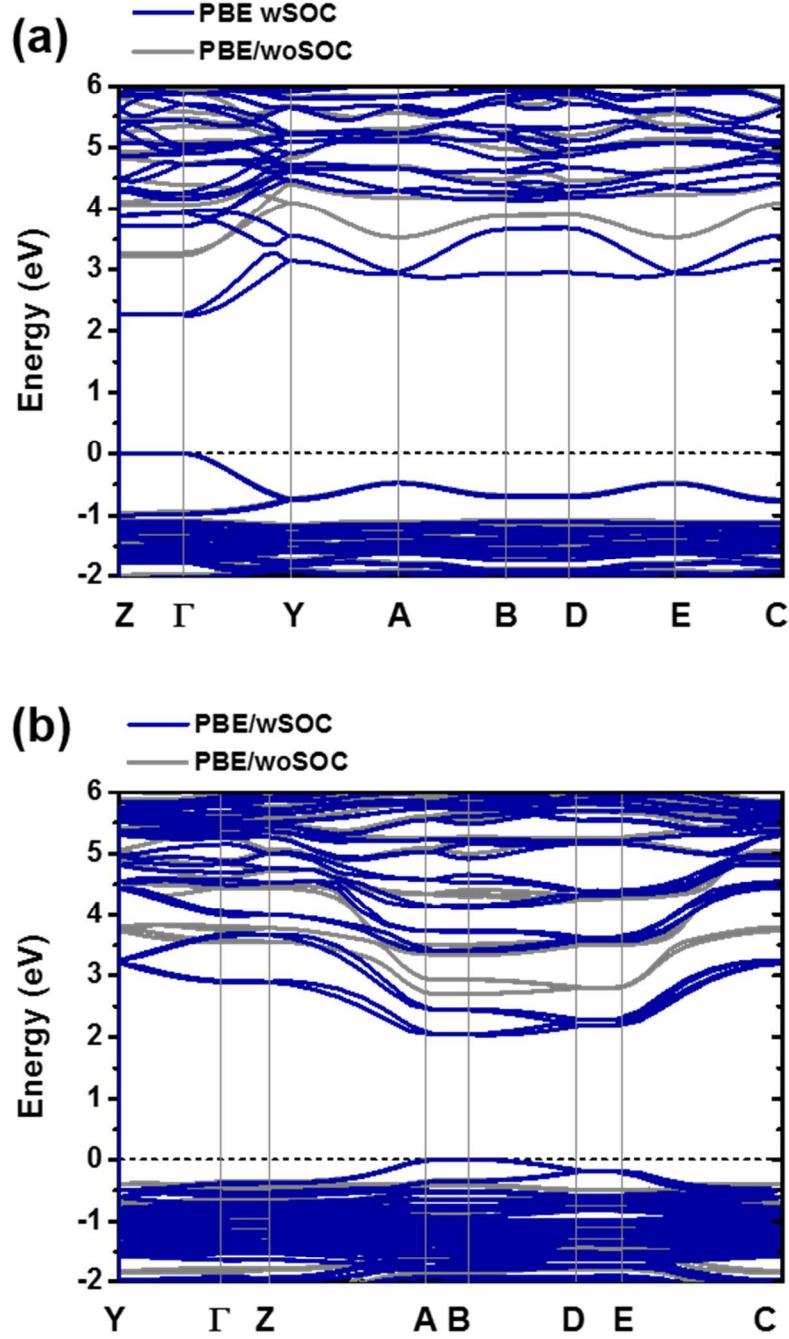

**Figure S2.** Band structures of the two-dimensional perovskites (a) (EDBE)PbCl<sub>4</sub> and (b) (EDBE)PbBr<sub>4</sub>, calculated with and without consideration of spin-orbit coupling at the PBE level, used for the evaluation of the optical response (Quantum Espresso code).

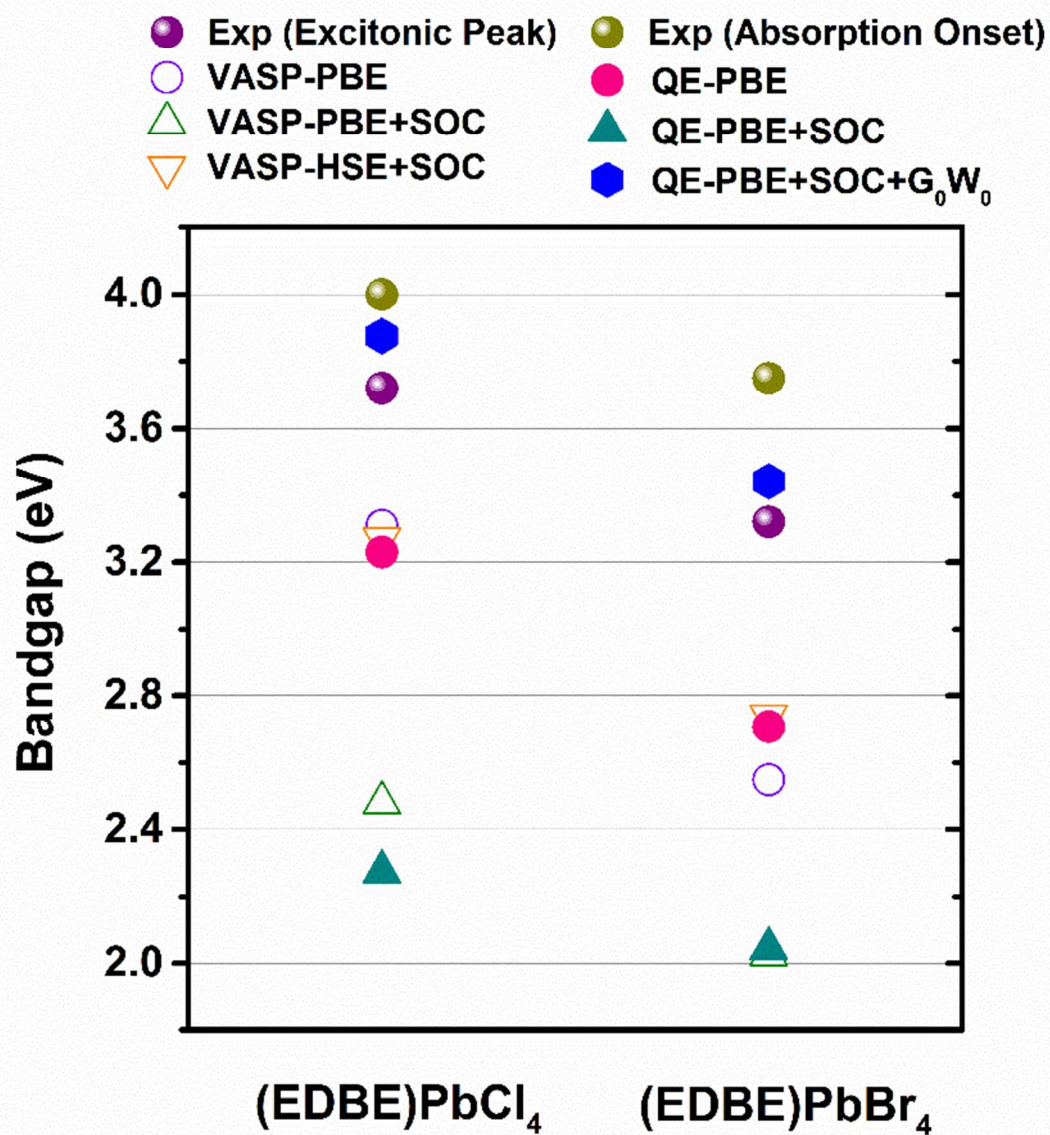

**Figure S3.** Bandgaps calculated using different methodologies (PBE, PBE+SOC, HSE+SOC, and PBE+SOC+G<sub>0</sub>W<sub>0</sub>) for the two-dimensional perovskites (EDBE)PbCl<sub>4</sub> and (EDBE)PbBr<sub>4</sub>.

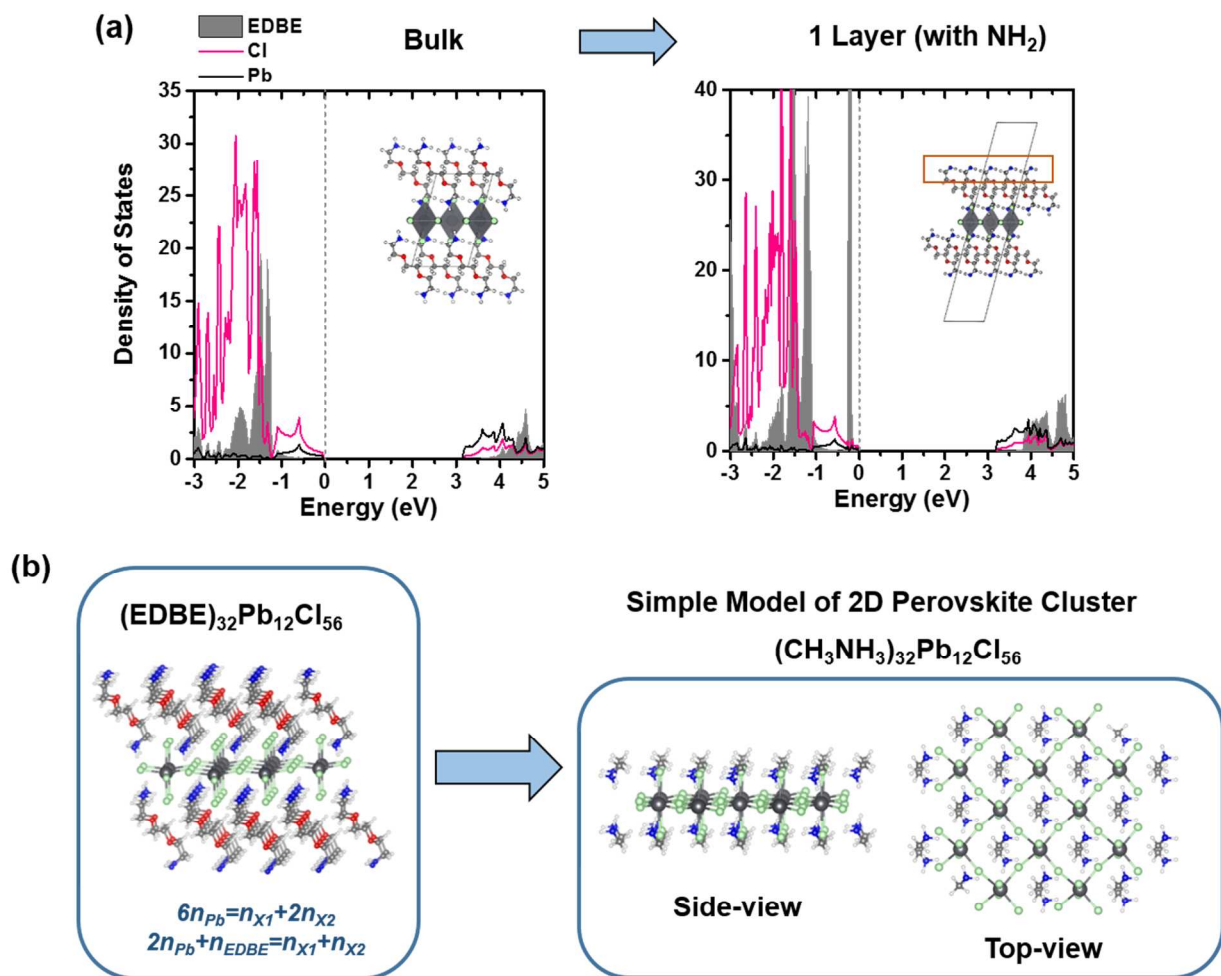

**Figure S4.** (a) Projected densities of states of (EDBE)PbCl<sub>4</sub> in the bulk and for a single layer with NH<sub>2</sub> terminations. (b) Molecular structures of the (EDBE)<sub>32</sub>Pb<sub>12</sub>Cl<sub>56</sub> cluster and corresponding simplified model of (CH<sub>3</sub>NH<sub>3</sub>)<sub>32</sub>Pb<sub>12</sub>Cl<sub>56</sub>.
